# Supplementary material for: Synthesis of graphene oxide–Ag2CO3composites with improved photoactivity and anti-photocorrosion
Source: Royal Society of Chemistry journal article supplement (doi:10.1039/c3ce41755g), 2013-10-25
Supplement: c3ce41755g.pdf [file c3ce41755g.pdf]

## Electronic Supplementary Information

### Synthesis of graphene oxide-Ag<sub>2</sub>CO<sub>3</sub> composites with improved photoactivity and anti-photocorrosion

Chao Dong,<sup>a</sup> Kong-Lin Wu,<sup>a</sup> Xian-Wen Wei <sup>\*a</sup>, Xiang-Zi Li,<sup>b</sup> Li Liu,<sup>a</sup> Ting-Hui  
Ding,<sup>a</sup> Jing Wang,<sup>a</sup> and Yin Ye<sup>a</sup>

<sup>a</sup> College of Chemistry and Materials Science, Key Laboratory of Functional  
Molecular Solids, the Ministry of Education, Anhui Laboratory of Molecular-Based  
Materials, Anhui Normal University, Wuhu 241000, P. R. China.

<sup>b</sup> Department of Chemistry, Wannan Medical College, Wuhu 241002, P. R. China

E-mail: xwwei@mail.ahnu.edu.cn

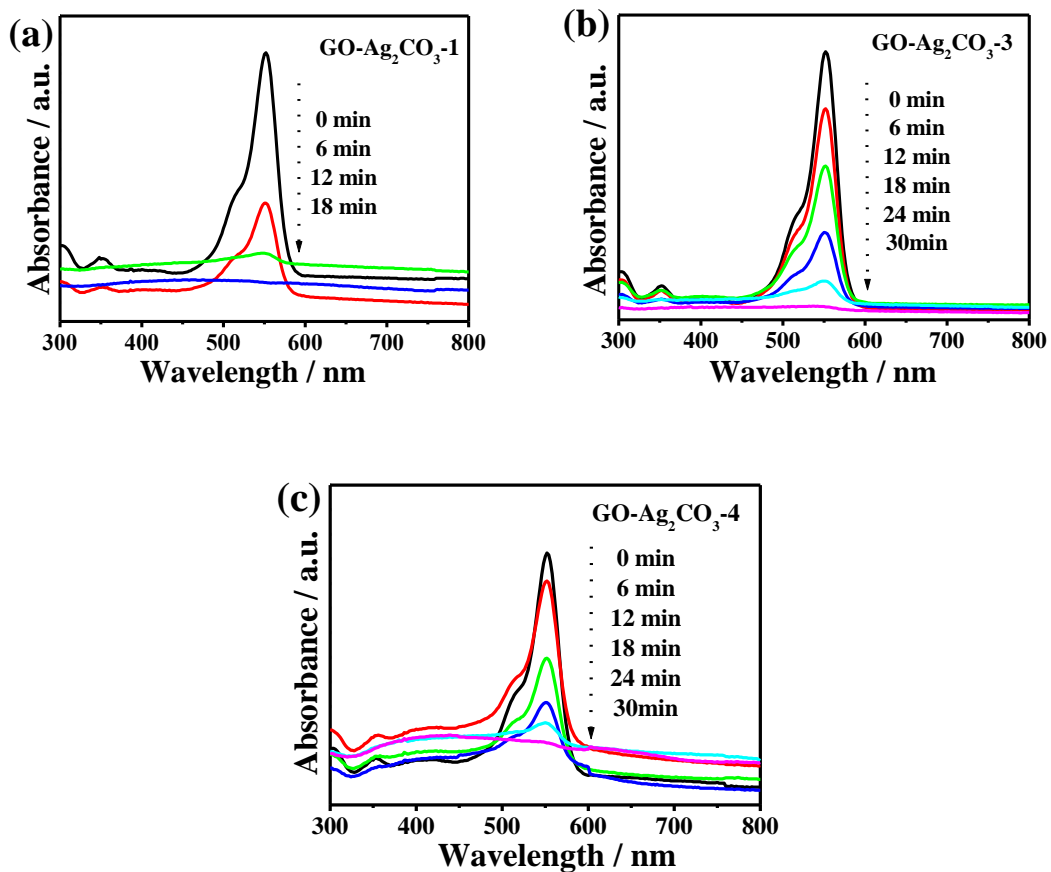

**Fig. S1.** UV-vis spectral changes of RhB in aqueous (a) GO-Ag<sub>2</sub>CO<sub>3</sub>-1, (b) GO-Ag<sub>2</sub>CO<sub>3</sub>-3, and (c) GO-Ag<sub>2</sub>CO<sub>3</sub>-4 dispersions as a function of irradiation time.

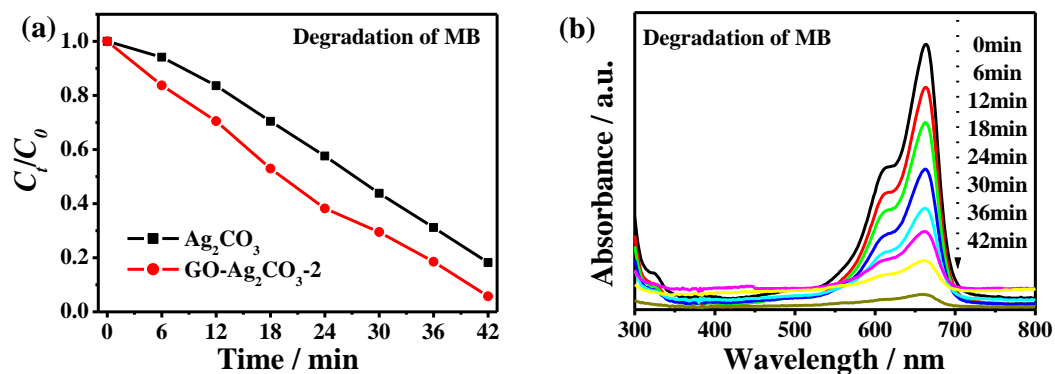

**Fig. S2.** (a) The dynamic curve of degradation of MB in aqueous  $\text{Ag}_2\text{CO}_3$  (black line) and  $\text{GO-Ag}_2\text{CO}_3\text{-2}$  (red line) dispersions, and (b) UV-Vis spectral changes of MB in aqueous  $\text{GO-Ag}_2\text{CO}_3\text{-2}$  dispersion as a function of irradiation time (30 mg of catalysts in 30 mL of MB aqueous solution (10 mg/L)).

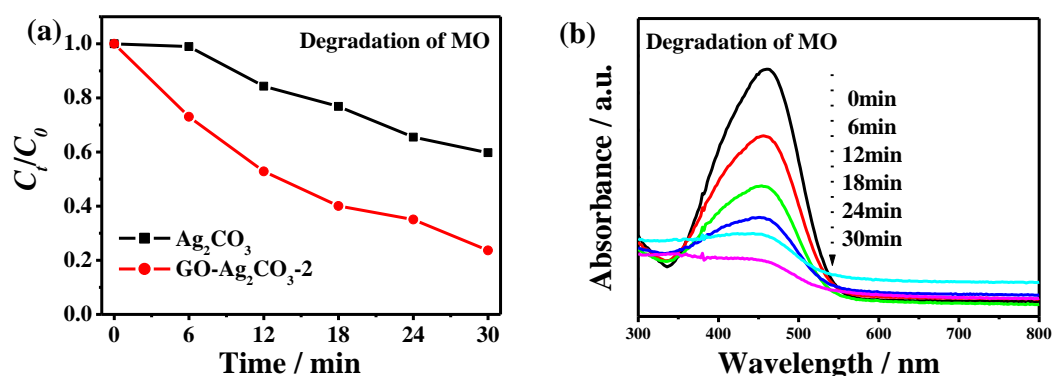

**Fig. S3.** (a) The dynamic curve of degradation of MO in aqueous  $\text{Ag}_2\text{CO}_3$  (black line) and  $\text{GO-Ag}_2\text{CO}_3\text{-2}$  (red line) dispersions, and (b) UV-Vis spectral changes of MO in aqueous  $\text{GO-Ag}_2\text{CO}_3\text{-2}$  dispersion as a function of irradiation time (50 mg of catalysts in 30 mL of MO aqueous solution (10 mg/L)).

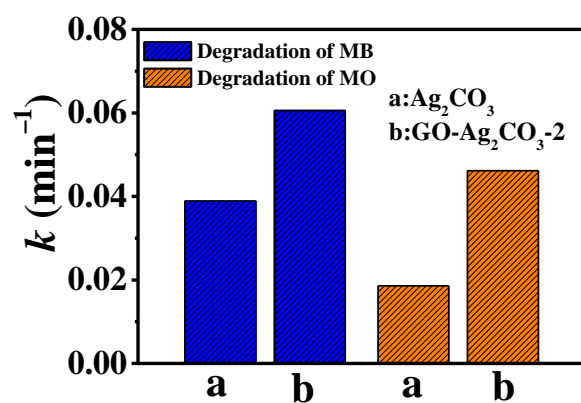

**Fig. S4.** Degradation rate constants for the photodegradation of MB and MO aqueous solution by Ag<sub>2</sub>CO<sub>3</sub> and GO-Ag<sub>2</sub>CO<sub>3</sub>-2.

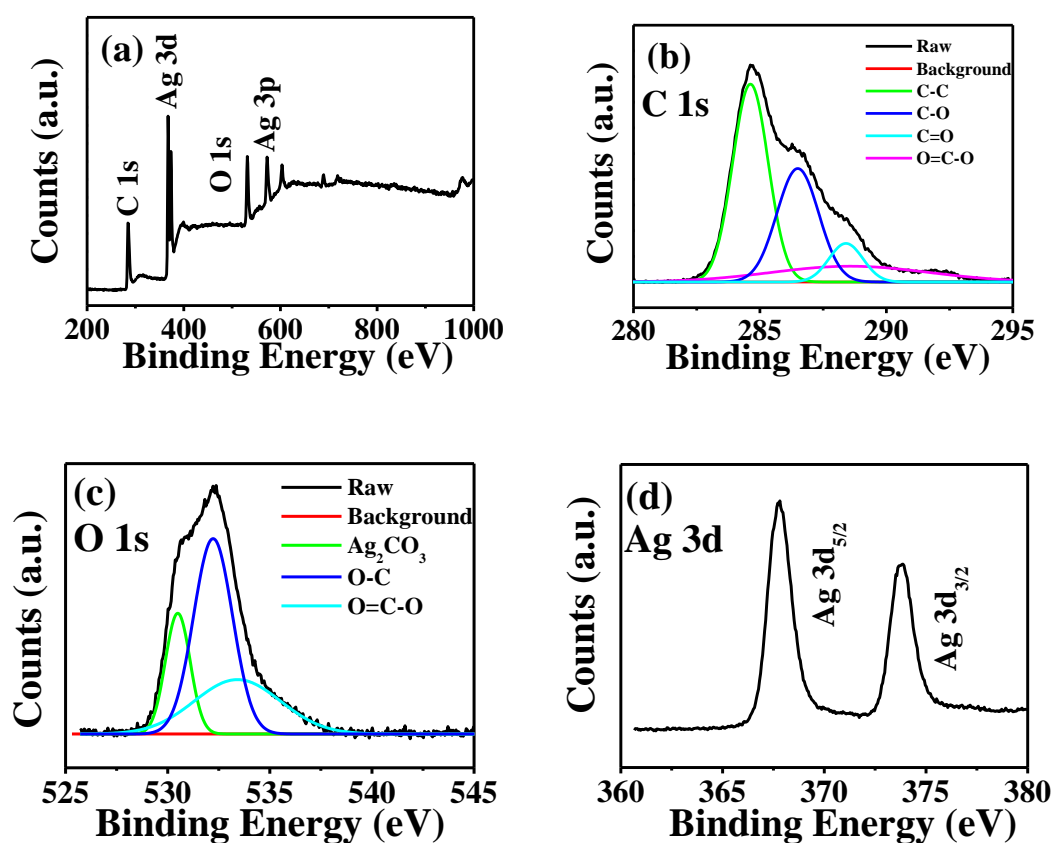

**Fig. S5.** XPS spectra of (a) survey, (b) C 1s, (c) O 1s, and (d) Ag 3d in the GO-Ag<sub>2</sub>CO<sub>3</sub>-2 composite after 5 cycle photodegradation experiments under visible light irradiation.

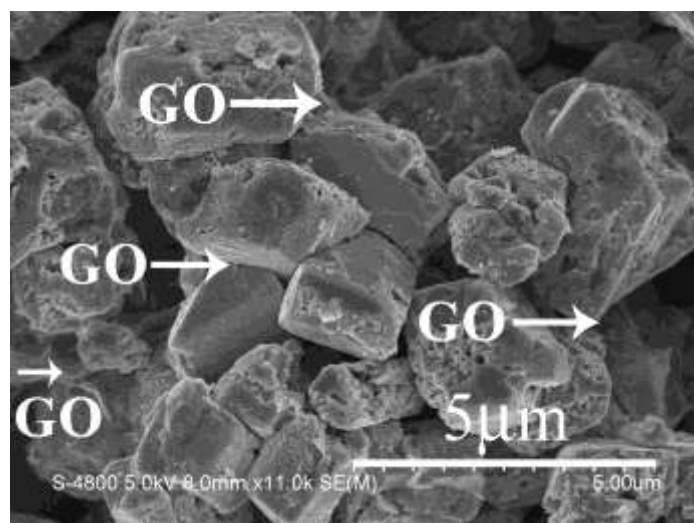

**Fig. S6.** SEM image of GO-Ag<sub>2</sub>CO<sub>3</sub>-2 after 5 cycle photodegradation experiments under visible light irradiation.

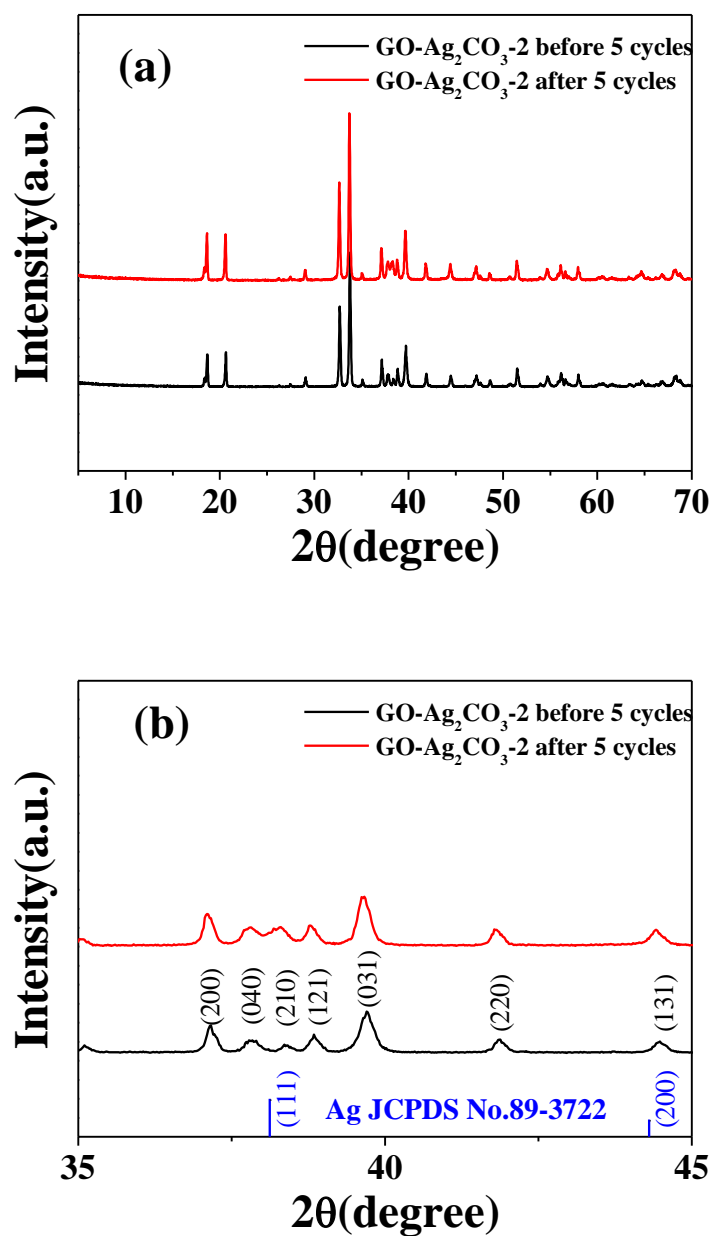

**Fig. S7.** (a) XRD patterns of  $\text{GO-Ag}_2\text{CO}_3\text{-2}$  before (black line) and after (red line) 5 cycle photodegradation experiments under visible light irradiation. (b) Detailed comparison of XRD patterns in (a) ( $2\theta$  from  $35^\circ$  to  $45^\circ$ )
